# Supplementary material for: Insight into Details of the Photosynthetic Light Reactions and Selected Metabolic Changes in Tomato Seedlings Growing under Various Light Spectra
Source: MDPI journal article supplement (doi:10.3390/ijms222111517), 2021-10-26
Supplement: s1 [file s1]

**Table S1.** Spectral composition of the light that was generated by specific lamps (HPS, L1-L7), for which the details of the specific peak parameters (maximum, width, area) were calculated. Table is complementary to Figure 10. *HPS – sodium lamp; L1 - blue/red light; L2 - blue/red light + far red; L3 - blue/red light + UV; L4 - white light that was supplemented with green; L5 - white light that was supplemented with blue; L6 - white light that was supplemented with red; L7 - white light supplemented with blue/UV. HPS - L5 – constant light 300  $\mu\text{mol m}^{-2} \text{s}^{-1}$ ; L6 - L7 light modulated (the sunrise and sunset accomplished by gradually increasing/decreasing the light intensity, in the middle of the day the light intensity was increased to 700  $\mu\text{mol m}^{-2} \text{s}^{-1}$  for 2h; for details see chapter 3.1).*

| Colours of Light | Peak Parameters        | Spectral Composition of the Light |      |      |      |      |      |      |      |
|------------------|------------------------|-----------------------------------|------|------|------|------|------|------|------|
|                  |                        | HPS                               | L1   | L2   | L3   | L4   | L5   | L6   | L7   |
| UV               | Maximum                |                                   |      |      | 400  |      |      |      | 401  |
|                  | Width                  | -                                 | -    | -    | 3.4  | -    | -    | -    | 25   |
|                  | Area                   |                                   |      |      | 100  |      |      |      | 266  |
| BLUE             | Maximum                | 437                               | 451  | 449  | 432  | 447  | 453  | 453  | 452  |
|                  | Width                  | 45                                | 23   | 26   | 31   | 26   | 26   | 24   | 23   |
|                  | Area                   | 193                               | 753  | 439  | 2106 | 505  | 729  | 533  | 2266 |
|                  | Maximum                | 465                               |      |      |      |      |      |      |      |
|                  | Width                  | 16                                |      |      |      | -    |      |      |      |
|                  | Area                   | 85                                |      |      |      |      |      |      |      |
| GREEN            | Maximum                | 497                               |      |      |      | 515  | 547  | 524  | 521  |
|                  | Width                  | 232                               |      |      |      | 43   | 100  | 89   | 98   |
|                  | Area                   | 206                               |      |      |      | 1058 | 2326 | 2031 | 6418 |
|                  | Maximum                |                                   |      |      |      | 555  |      |      |      |
|                  | Width                  | -                                 |      |      |      | 80   |      | -    |      |
|                  | Area                   |                                   |      |      |      | 3842 |      |      |      |
| YELLOW           | Maximum                | 567                               |      | -    |      |      |      |      |      |
|                  | Width                  | 15                                |      |      |      |      |      |      |      |
|                  | Area                   | 484                               |      |      |      |      |      |      |      |
| ORANGE           | Maximum                | 597                               |      |      |      |      |      | -    |      |
|                  | Width                  | 40                                |      |      |      |      |      |      |      |
|                  | Area                   | 2910                              |      |      |      |      |      |      |      |
| RED              | Maximum                | 641                               | 649  | 647  | 667  | 646  | 645  | 646  | 645  |
|                  | Width                  | 35                                | 90   | 80   | 98   | 100  | 100  | 100  | 100  |
|                  | Area                   | 337                               | 3783 | 1880 | 1643 | 3256 | 2705 | 3990 | 9614 |
|                  | Maximum                | 668                               |      |      |      |      |      |      |      |
|                  | Width                  | 64                                |      |      |      | -    |      |      |      |
|                  | Area                   | 619                               |      |      |      |      |      |      |      |
| FAR-RED          | Maximum                |                                   |      | 734  |      |      |      |      |      |
|                  | Width                  |                                   | -    | 45   |      |      | -    |      |      |
|                  | Area                   |                                   |      | 1205 |      |      |      |      |      |
| BLUE:RED         | Ratio of the peak area | 0.3                               | 0.2  | 0.2  | 1.3  | 0.1  | 0.3  | 0.1  | 0.2  |
| BLUE:RED         | Ratio of 440:680 nm    | 0.4                               | 0.5  | 0.6  | 3.6  | 0.7  | 0.6  | 0.4  | 0.9  |
